# Supplementary material for: Enhanced Hsa-miR-181d/p-STAT3 and Hsa-miR-181d/p-STAT5A Ratios Mediate the Anticancer Effect of Garcinol in STAT3/5A-Addicted Glioblastoma
Source: PubMed Central journal article supplement (PMC6966688; doi:10.3390/cancers11121888), 2019-11-27
Supplement: cancers-11-01888-s001.pdf [file cancers-11-01888-s001.pdf]

# Enhanced Hsa-miR-181d/p-STAT3 and Hsa-miR-181d/p-STAT5A Ratios Mediate the Anticancer Effect of Garcinol in *STAT3/5A*-Addicted Glioblastoma

Heng-Wei Liu, Peter Mingjui Lee, Oluwaseun Adebayo Bamodu, Yu-Kai Su, Iat-Hang Fong, Chi-Tai Yeh, Ming-Hsien Chien, I-Hung Kan and Chien-Min Lin

Table S1. Western blot antibodies sheet used in this study.

| No. | Target     | Dilution |            | Source        |
|-----|------------|----------|------------|---------------|
| 1   | Jak2       | 1:1000   | #3230      | cellsignaling |
| 2   | Stat3      | 1:1000   | #9132      | cellsignaling |
| 3   | p-Stat3    | 1:1000   | #9145      | cellsignaling |
| 4   | Stat5      | 1:1000   | ab227687   | abcam         |
| 5   | p-Stat5    | 1:1000   | ab32364    | abcam         |
| 6   | ERK        | 1:1000   | #4695      | cellsignaling |
| 7   | p-ERK      | 1:1000   | #4370      | cellsignaling |
| 8   | Akt        | 1:1000   | #2920      | cellsignaling |
| 9   | p-Akt      | 1:1000   | #4060      | cellsignaling |
| 10  | Bax        | 1:1000   | #5023      | cellsignaling |
| 11  | Bcl-xL     | 1:1000   | #2764      | cellsignaling |
| 12  | SOX2       | 1:500    | #3579      | cellsignaling |
| 13  | OCT4       | 1:500    | #2840      | cellsignaling |
| 14  | N-Cadherin | 1:1000   | #13116     | cellsignaling |
| 15  | E-Cadherin | 1:1000   | 20874-1-AP | PROTEINTECH   |
| 16  | Vimentin   | 1:1000   | #5741      | cellsignaling |
| 17  | Slug       | 1:1000   | #9585      | cellsignaling |
| 18  | GAPDH      | 1:10000  | 10494-1-AP | PROTEINTECH   |

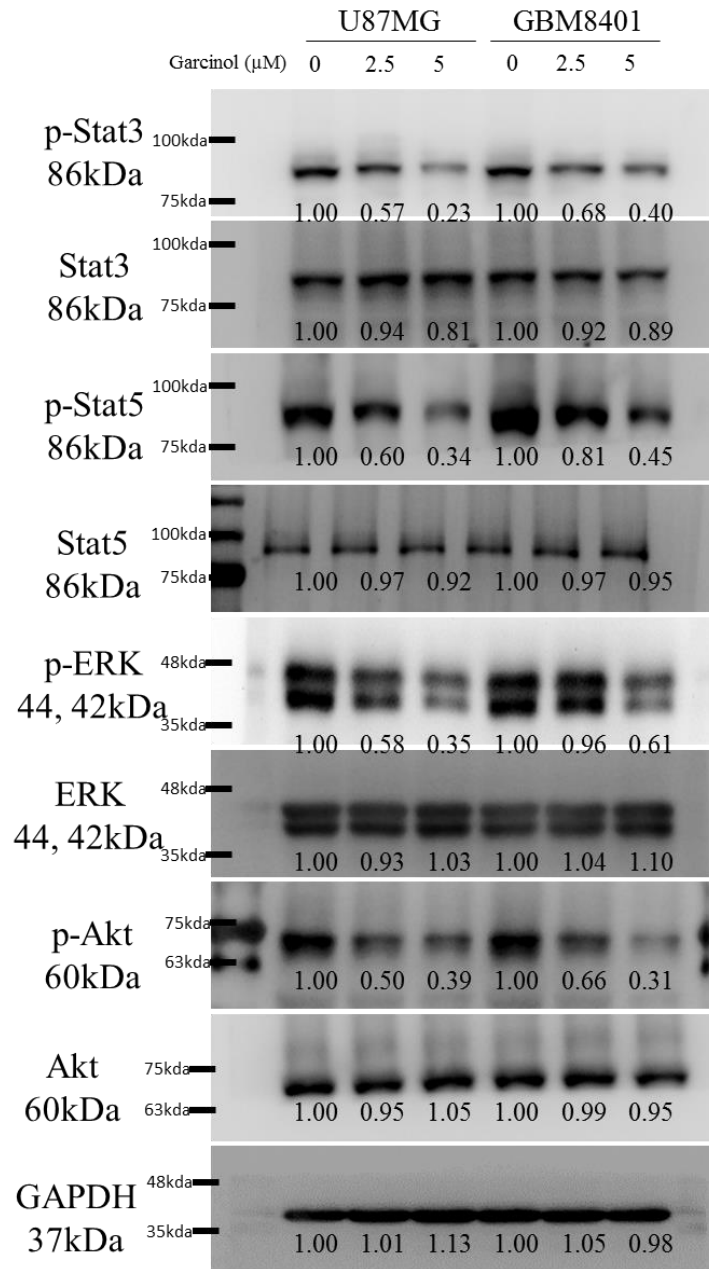

**Figure S1.** Full-size blots of Figure 2B.

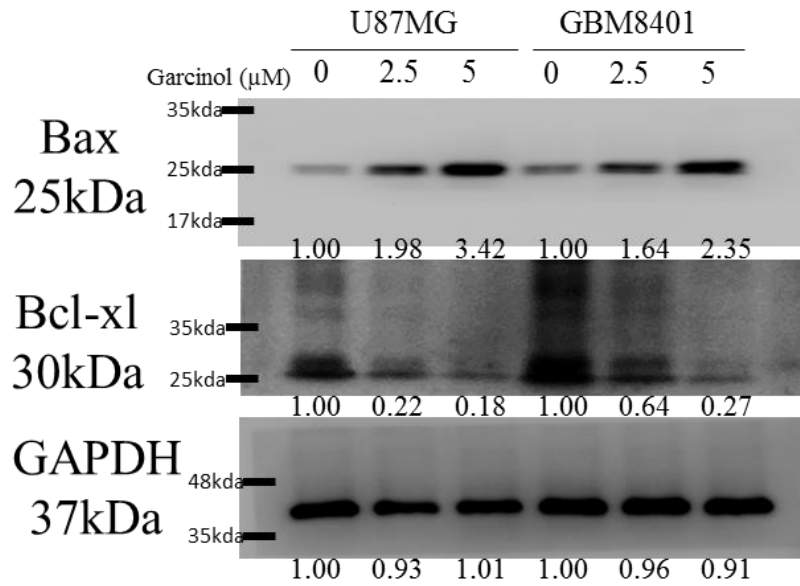

**Figure S2.** Full-size blots of Figure 2D.

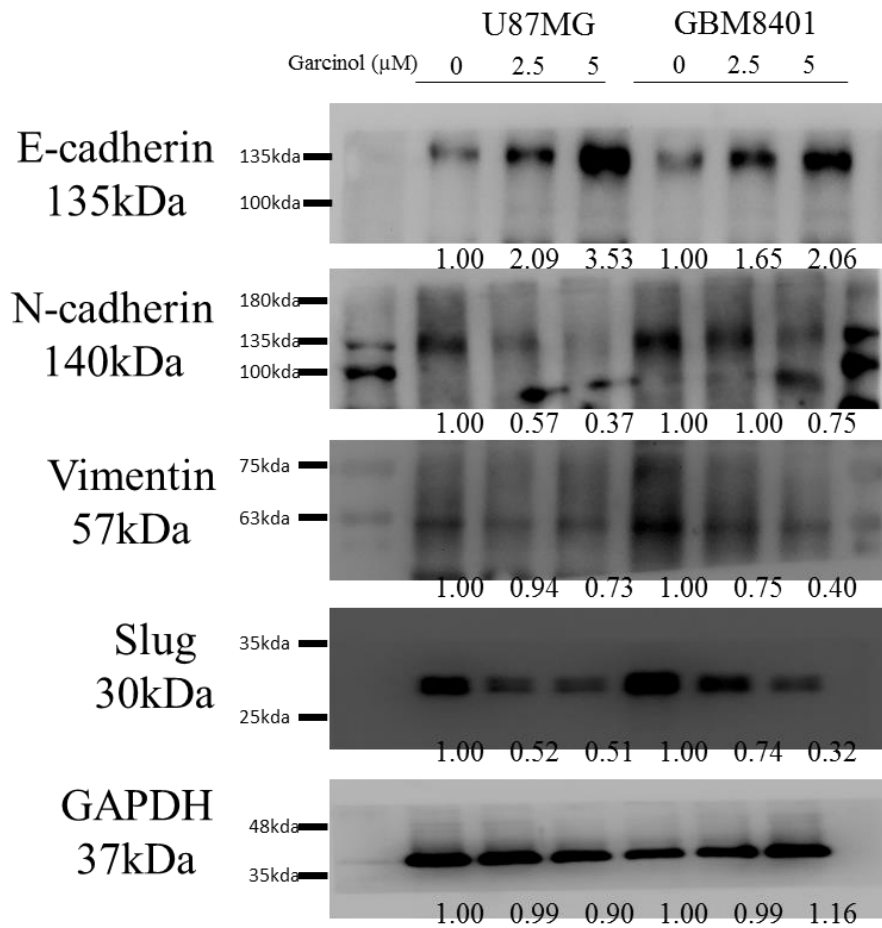

**Figure S3.** Full-size blots of Figure 2H.

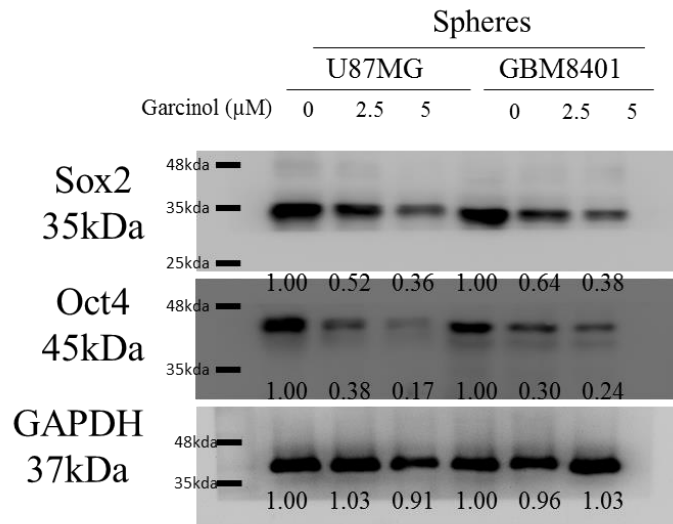

**Figure S4.** Full-size blots of Figure 3E.

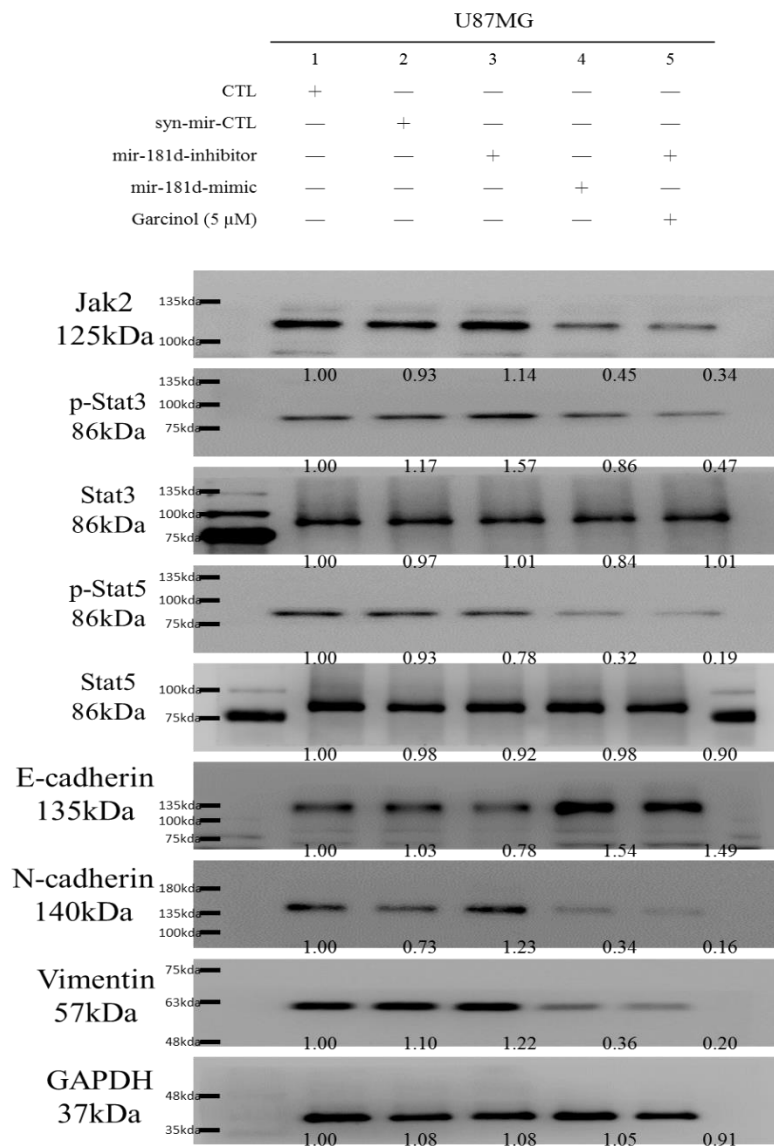

**Figure S5.** Full-size blots of Figure 4E.

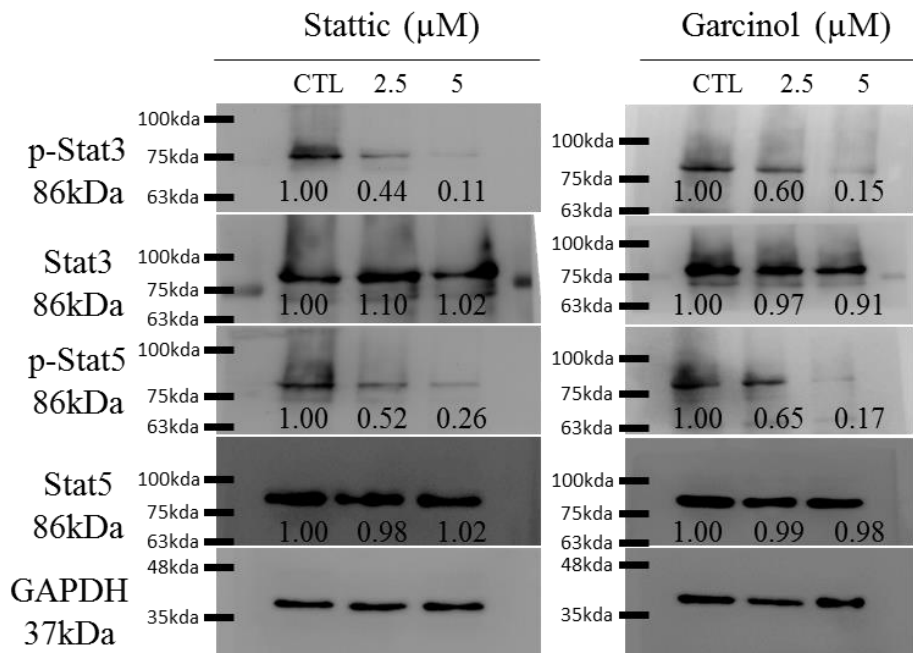

Figure S6. Full-size blots of Figure 6B.

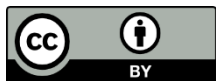

© 2019 by the authors. Licensee MDPI, Basel, Switzerland. This article is an open access article distributed under the terms and conditions of the Creative Commons Attribution (CC BY) license (<http://creativecommons.org/licenses/by/4.0/>).
